# Supplementary material for: DNA methylation induces subtle mechanical alteration but significant chiral selectivity
Source: Royal Society of Chemistry journal article supplement (doi:10.1039/d3cc05211g), 2023-01-01
Supplement: d3cc05211g1.pdf [file d3cc05211g1.pdf]

Supplementary Information

**DNA methylation induces subtle mechanical alteration but significant chiral selectivity**

Yi Zeng,<sup>[a]†</sup> Yujia Mao,<sup>[a]†</sup> Yanjun Chen,<sup>[a]</sup> Yuhong Wang,<sup>\*[b]</sup> and Shoujun Xu<sup>\*[a]</sup>

<sup>[a]</sup>Department of Chemistry, <sup>[b]</sup>Department of Biology and biochemistry,

University of Houston, Houston, TX 77204, USA

<sup>\*</sup>Corresponding authors, E-mail: [ywang60@uh.edu](mailto:ywang60@uh.edu), [sxu7@uh.edu](mailto:sxu7@uh.edu)

<sup>†</sup>These authors contributed equally to this work.

Table of Contents

1. Experimental details and the instrument, with Figure S1;
2. Force calibration, with Figure S2;
3. Force dependence on sample distance, with Figure S3;
4. Standard deviations of the dissociation voltages;
5. Structures of the drug molecules, with Figure S4.

## 1. Experimental details and the instrument

### *Materials:*

The DNA oligomers were purchased from IDT (Integrated DNA Technologies, Coralville, USA). Magnetic beads M280 was purchased from Fisher Scientific (10 mg/mL, Cat. # 11205D). The drug molecules, *d*-tetrahydropalmatine (THP) (ab142555, Abcam Biochemicals, purity >98%), *l*-THP (1614, AvaChem Scientific, 98%), *l*-stepholidine (FS74167, Biosynth International, purity >95%) were purchased and used directly. All other chemicals were purchased from Sigma Aldrich unless specified otherwise.

DNA sequences for calibration are:

5'Bio/G TAC GTA AAT CTA CTG CTG AA (Strand 0)

3'-G CAT TTA GAT GAC GA/Bio (15 bp with Stran 0)

3'- CAT TTA GAT GAC GA/Bio (14 bp with Stran 0)

3'-AT TTA GAT GAC GA/Bio (13 bp with Stran 0)

3'-T TTA GAT GAC GA/Bio (12 bp with Stran 0)

3'-TTA GAT GAC GA/Bio (11 bp with Stran 0)

DNA sequences for methylation study are:

5'Bio/CCC AAT CGA CCC (none methylated)

3'Bio/GGG TTA GCT GGG (complementary to the previous strand)

5'Bio/CCC AAT m<sup>5</sup>CGA CCC (one methylated)

3'Bio/GGG TTA Gm<sup>5</sup>CT GGG (for two methylated duplex)

### *Instrument:*

A home-built atomic magnetometer was used to measure the magnetic signal of the samples, with a sensitivity of  $\sim 150 \text{ fT}/\sqrt{\text{Hz}}$ . The  $^{133}\text{Cs}$  atomic sensor, which was cubic with 6 mm side length, was housed in a four-layer magnetic shield. Linear polarized laser at 894.5952 nm was used to excite the Cs atoms (TLB-6818, Newport). A linear motor was used to scan the sample (Ultra Motion, Cutchogue). For force generation, a piezo disk of 15 mm diameter and 2 mm thick was used. Ultrasound at 1.00 MHz was generated by a function generator (DS345, Stanford Research System) and amplified by an AR amplifier (75A250A, AR).

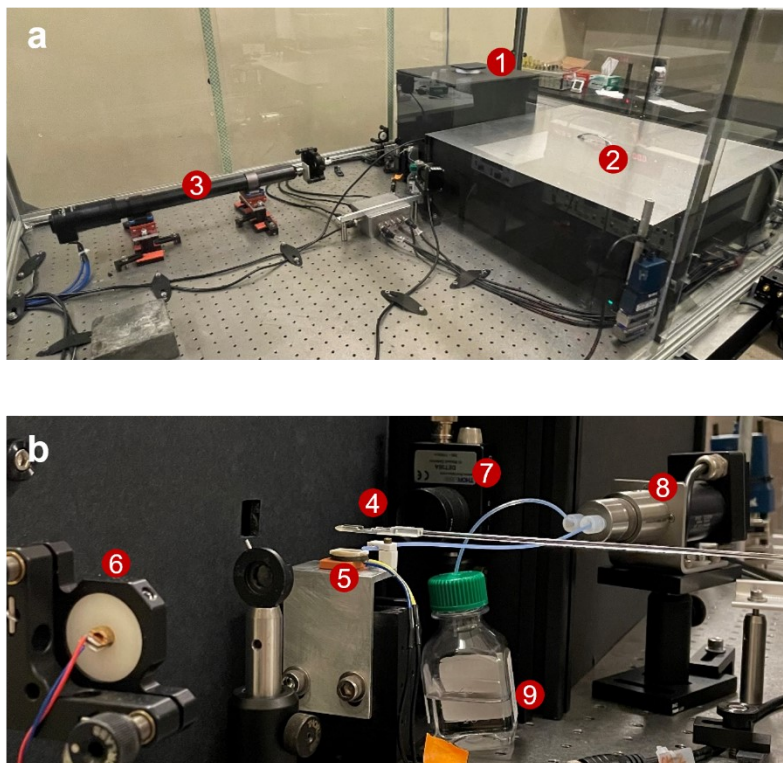

**Figure S1.** Photos of the instrument. a. Overview of the apparatus. 1, atomic sensor housed inside a four-layer magnetic shield; 2, laser and optics; 3, motor for sample scanning. b. details of the sample region. 4, sample holder; 5, piezo on a translation stage; 6, laser diode; 7, photo detector; 8, pump; 9, water reservoir.

*Procedure:*

The sample well with dimensions of  $4 \times 3 \times 2 \text{ mm}^3$  was coated with biotin (Biotin-PEG-SVA-5000 and MPEG-SVA-5000, 1:30 ratio, Laysan Bio Inc). Streptavidin (ThermoFisher Scientific) with a concentration of  $0.25 \text{ mg/mL}$  was introduced onto the surface and incubated for 1 h. After rinsing off excess streptavidin, the first DNA ( $1 \text{ }\mu\text{M}$ ) with a biotin linker was added into the sample well and immobilized on the surface via biotin-streptavidin interaction. The incubation process was for 1 hr. Excess DNA was also rinsed off afterwards; then  $1 \text{ }\mu\text{M}$  of probing DNA was added and incubated overnight. Next, streptavidin-coated magnetic beads M280 were diluted to approximately  $0.5 \text{ mg/mL}$  and introduced into the sample well. After 2 hr incubation, each sample was magnetized for 2 min on a permanent magnet ( $\sim 0.5 \text{ T}$ ), and centrifuged (5427R, Eppendorf) at 1500 rpm (revolution per minute) for 20 min to remove nonspecifically bound magnetic beads. For the DNA-drug interaction experiments, the drug

(*d*-THP, *l*-THP, or *l*-stepholidine) was introduced to the sample well after centrifugation and incubated for 1 hr, with final concentration of 100  $\mu$ M. All the mixtures were in TAM<sub>10</sub> buffer, which contains 20 mM tris-HCl (15568025, ThermoFisher Scientific), 30 mM NH<sub>4</sub>Cl (213330, Sigma Aldrich), 70 mM KCl (P3911, Sigma Aldrich), 5 mM EDTA (15575, Invitrogen), 7 mM BME (2-mercaptoethanol) (M3148, Sigma Aldrich), 10 mM MgCl<sub>2</sub> (M1028, Sigma Aldrich).

## 2. Force calibration

Force calibration was carried out using a series of DNA duplexes with 11-15 bp respectively. The dissociation forces in pN were obtained using centrifugal force, in which  $F = m\omega^2r$ . Here  $m$  is the buoyant mass of the magnetic beads,  $\omega$  is the angular speed of the centrifuge for duplex dissociation,  $r$  is the radius of the centrifuge (7.5 cm for Eppendorf 5470R) (Refs. 24, 25). Linear fitting yields  $F = 1024.7V^2 + 16.0$ , in which  $V$  is in volts and  $F$  in pN.

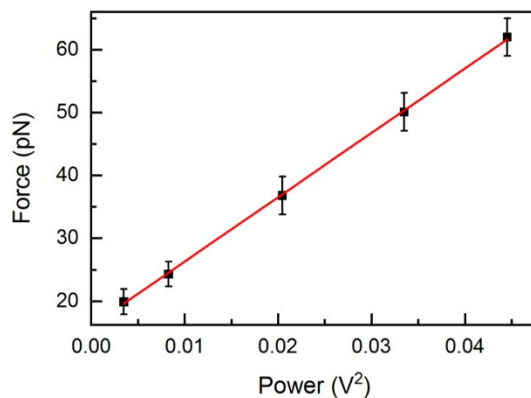

**Figure S2.** Calibration of ultrasound force using DNA duplexes with different lengths

## 3. Force dependence on sample distance calibration

Using the 13-bp DNA duplex, we have measured the dissociation voltage at several sample distances. The variation of dissociation voltages shows the necessity of maintaining a constant sample distance for the duration of the experiment.

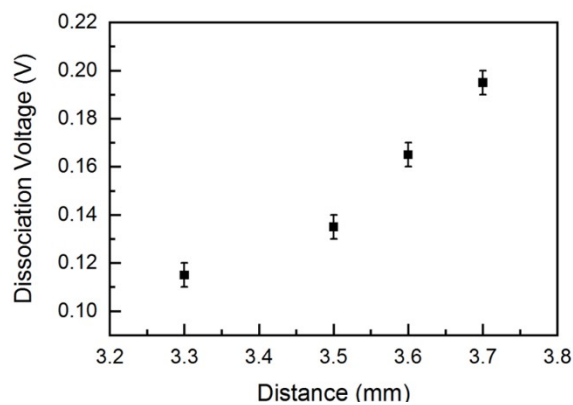

**Figure S3.** Dissociation voltage vs. sample distance.

4. Standard deviations of the dissociation voltages\*

|                   | #1    | #2    | #3    | #4    | #5    | Standard deviation* |
|-------------------|-------|-------|-------|-------|-------|---------------------|
| 0 CH <sub>3</sub> | 0.155 | 0.155 | 0.155 | 0.154 | 0.153 | 0.00089             |
| 1 CH <sub>3</sub> | 0.161 | 0.161 | 0.161 | 0.160 | 0.162 | 0.00071             |
| 2 CH <sub>3</sub> | 0.171 | 0.171 | 0.171 | 0.170 | 0.169 | 0.00089             |

\*Unit: V.

All the standard deviations were less than the 0.001 V variation of the ultrasound amplitude.

5. Structures of the drug molecules

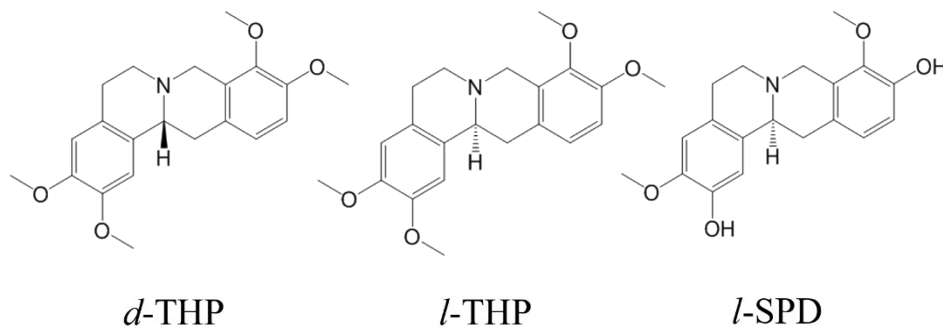

**Figure S4.** Structures of the three drug molecules. THP: tetrahydropalmatine; SPD: stepholidine.
